# Supplementary material for: Effect of Ionic Liquids on the Physical Properties of the Newly Synthesized Conducting Polymer
Source: Hindawi journal article supplement (doi:10.1155/2018/8275985), 2018-06-24
Supplement: f1 [file 8275985.f1.docx]

Supplementary Material

Effect of ionic liquids on the physical properties of the newly synthesized conducting polymer

Dong Uk Lee1, Jin Yeong Jeong1, Ji Woong Han1,Gi-Chung Kwon2, Pankaj Attri2* and In Tae Kim1*

1 Department of Chemistry, Kwangwoon University, Seoul, Korea 139-701

2 Plasma BioScience Research Center / Department of Electrical and biological Physics, Kwangwoon University, Seoul, Korea 139-701

**FigureS1**. AFM images of the polymer and polymer-ILs (1 wt%) mixtures: (a) polymer; (b) polymer + [Bmim]Br; (c) polymer + [Emim]Br; (d) polymer + TMEAS and (e) polymer + TBMS

**FigureS2**. AFM images of the polymer and polymer-ILs (2 wt%) mixtures: (a) polymer + [Bmim]Br; (b)polymer + [Emim]Br; (c)polymer + TMEAS;and (d) polymer + TMEAS

**FigureS3**. AFM images of the polymer and polymer-ILs (5 wt%) mixtures: (a) polymer + [Bmim]Br; (b)polymer + [Emim]Br; (c)polymer + TMEAS;and (d) polymer + TMEAS


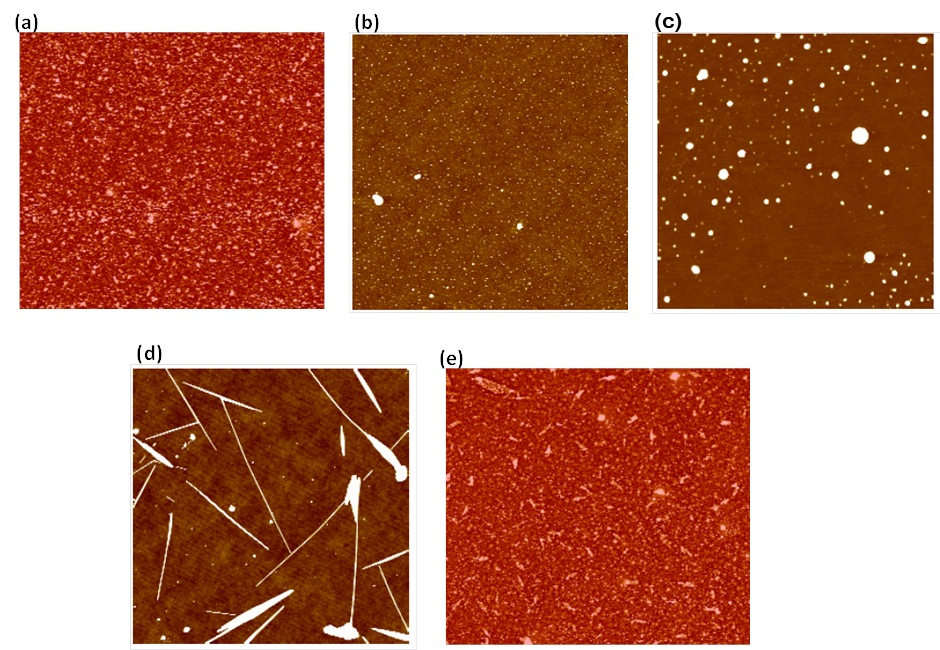


Figure S1

Figure S2

Figure S3
